# Supplementary material
Source: publisher figshare collection journal article supplement (https://acs.figshare.com/ndownloader/files/4185403)
Supplement: Supplementary file 1 [file 4185403]

## Supporting Information

**S1. X-ray data for acetaminophen crystallized from pure ethanol and in the presence of  $\alpha$ -lactose monohydrate, D-mannitol, graphite, L-histidine and sodium chloride.**

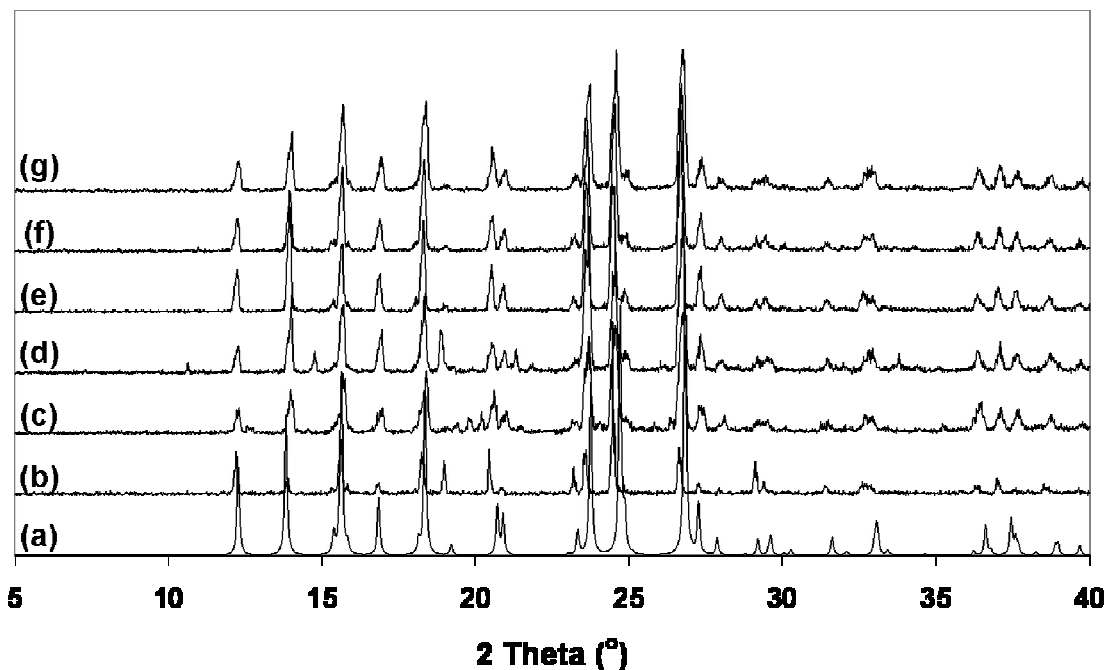

**Figure S1.** X-ray diffraction data for (a) AAP Form I simulated in Mercury 2.4 (b) AAP from pure ethanol (c) AAP crystallized in the presence of  $\alpha$ -lactose monohydrate (d) AAP crystallized in the presence of D-mannitol (e) AAP crystallized in the presence of graphite (f) AAP crystallized in the presence of L-histidine and (g) AAP crystallized in the presence of sodium chloride.

Diffraction pattern simulated in Mercury 2.4 using CIF file found in Cambridge Structural Database (REF Code: HXACAN07).

**S2. Optical micrographs of the  $\alpha$ -lactose monohydrate and D-mannitol crystals used in the induction time measurements.**

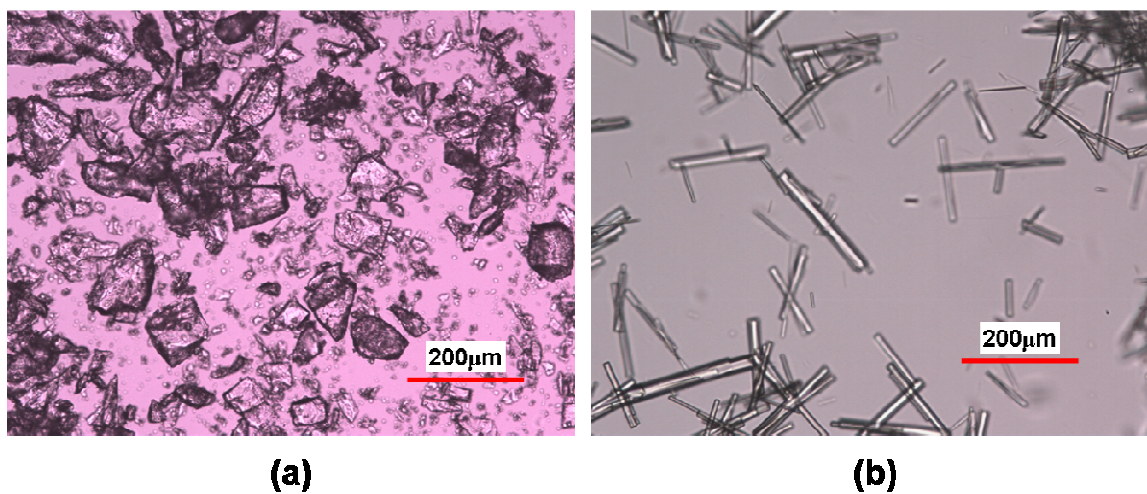

**Figure S2.** Optical micrographs of (a)  $\alpha$ -lactose monohydrate and (b) D-mannitol crystals used in the acetaminophen induction time experiments.

**S3. EpiCalc epitaxy calculation for (0-11) Form I acetaminophen with (0-11)  $\alpha$ -lactose monohydrate and (100) Form I acetaminophen with (00-1) D-mannitol.**

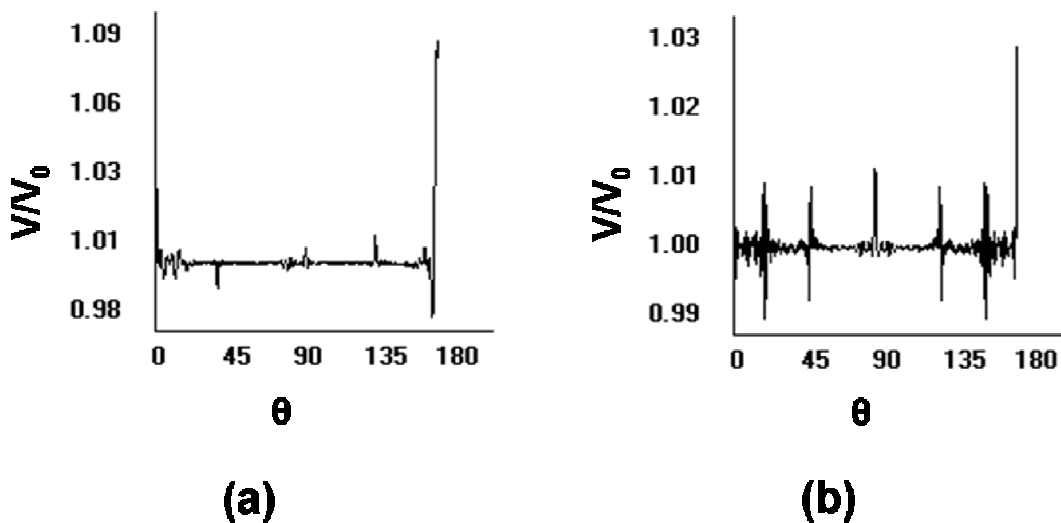

**Figure S3.** A plot of dimensionless potential energy ( $V/V_0$ ) as a function of orientation angle ( $\theta$ ) for **a)** (0-11) face of acetaminophen and (0-11) face of  $\alpha$ -lactose monohydrate and **b)** (100) face of acetaminophen and (00-1) of D-mannitol.

The EpiCalc calculations were performed using the following lattice values for the (0-11) and (100) faces of Form I acetaminophen, the (0-11) face of  $\alpha$ -lactose monohydrate and the (00-1) face of D-mannitol:

(0-11) Form I acetaminophen:  $a = 14.84 \text{ \AA}$ ,  $b = 7.09 \text{ \AA}$  and  $\beta = 96.12^\circ$

(100) Form I acetaminophen:  $a = 11.62 \text{ \AA}$ ,  $b = 9.23 \text{ \AA}$  and  $\beta = 90^\circ$

(0-11)  $\alpha$ -lactose monohydrate:  $a = 15.19 \text{ \AA}$ ,  $b = 9.57 \text{ \AA}$  and  $\alpha = 95.85^\circ$

(00-1) D-mannitol:  $a = 16.9 \text{ \AA}$ ,  $b = 8.69 \text{ \AA}$  and  $\alpha = 90^\circ$

The acetaminophen overlayer dimensions were  $25 \times 25$  cells and the orientation angle range tested was  $180^\circ$  with a step size of  $0.25^\circ$ .

**S4. EpiCalc epitaxy calculation for the (100) and (0-11) faces of Form I acetaminophen with the (002) face of graphite**

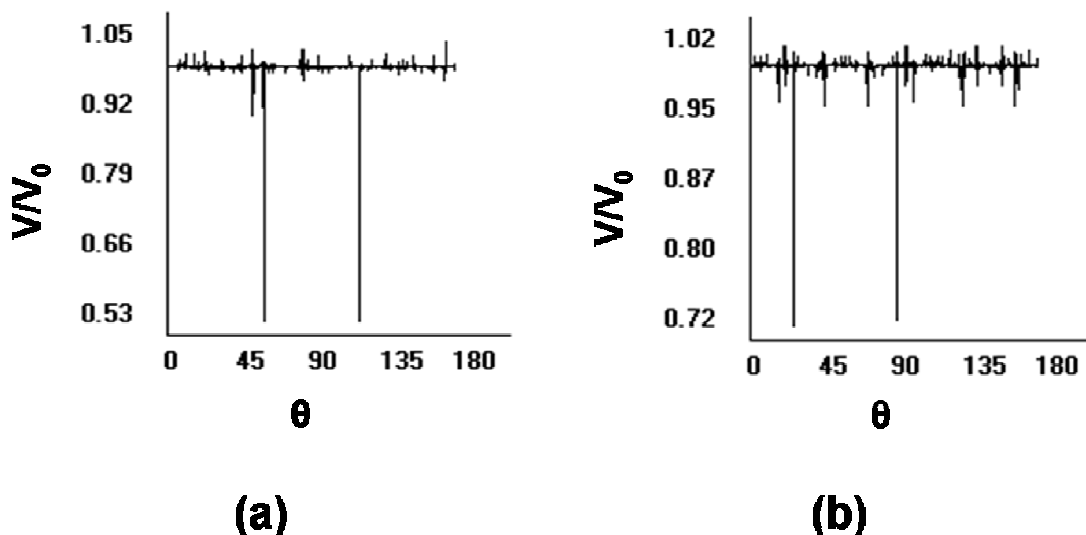

**Figure S4.** A plot of dimensionless potential energy ( $V/V_0$ ) as a function of orientation angle ( $\theta$ ) for **a)** (100) face of acetaminophen and (002) face of graphite and **b)** (0-11) face of acetaminophen and (002) of graphite.

The EpiCalc calculations were performed using the following lattice values for the (100) and (0-11) faces of Form I acetaminophen and the (002) face of graphite:

(100) Form I acetaminophen:  $a = 11.62 \text{ \AA}$ ,  $b = 9.23 \text{ \AA}$  and  $\beta = 90^\circ$

(0-11) Form I acetaminophen:  $a = 14.84 \text{ \AA}$ ,  $b = 7.09 \text{ \AA}$  and  $\beta = 96.12^\circ$

(002) graphite:  $a = b = 2.456 \text{ \AA}$  and  $\alpha = 120^\circ$

The acetaminophen overlayer dimensions were  $25 \times 25$  cells and the orientation angle range tested was  $180^\circ$  with a step size of  $0.25^\circ$ .

**S5. Table displaying the minimum interaction energy and optimal orientation angle between the D-mannitol (00-1) face and acetaminophen (100) face at different interplanar distances**

| Interplanar distance (Å) | Azimuthal Angle (°) | Interaction energy per cell (kcal/mol) |
|--------------------------|---------------------|----------------------------------------|
| 7                        | 90                  | -0.50                                  |
| 6.8                      | 270                 | -0.55                                  |
| 6.6                      | 270                 | -0.61                                  |
| 6.4                      | 270                 | -0.66                                  |
| 6.2                      | 270                 | -0.72                                  |
| 6                        | 270                 | -0.78                                  |
| 5.8                      | 270                 | -0.83                                  |
| 5.6                      | 90                  | -0.92                                  |
| 5.4                      | 90                  | -1.01                                  |
| 5.2                      | 90                  | -1.11                                  |
| 5                        | 90                  | -1.24                                  |
| 4.8                      | 90                  | -1.39                                  |
| 4.6                      | 90                  | -1.56                                  |
| 4.4                      | 90                  | -1.72                                  |
| 4.2                      | 75                  | -1.91                                  |
| 4                        | 25                  | -2.16                                  |
| 3.8                      | 25                  | -2.45                                  |
| 3.6                      | 25                  | -2.77                                  |
| 3.4                      | 25                  | -3.06                                  |
| 3.2                      | 270                 | -3.33                                  |
| 3                        | 90                  | -3.78                                  |
| 2.8                      | 90                  | -4.28                                  |
| 2.6                      | 90                  | -4.78                                  |
| 2.4                      | 90                  | -4.99                                  |
| 2.2                      | 90                  | -4.85                                  |
| 2                        | 155                 | -4.84                                  |
| 1.8                      | 270                 | -5.15                                  |
| 1.6                      | 270                 | -5.59                                  |
| 1.4                      | 270                 | -5.61                                  |
| 1.2                      | 270                 | -4.53                                  |
| 1                        | 260                 | -1.93                                  |
| 0.8                      | 260                 | 3.94                                   |
| 0.6                      | 260                 | 20.93                                  |
| 0.4                      | 90                  | 57.26                                  |
| 0.2                      | 90                  | 108.45                                 |

**S6. Table displaying the minimum interaction energy and optimal orientation angle between the  $\alpha$ -lactose (0-11) face and acetaminophen (0-11) face at different interplanar distances**

| Interplanar distance (Å) | Azimuthal Angel (°) | Interaction energy per cell (kcal/mol) |
|--------------------------|---------------------|----------------------------------------|
| 6                        | 265                 | -2.00                                  |
| 5.8                      | 265                 | -2.25                                  |
| 5.6                      | 265                 | -2.53                                  |
| 5.4                      | 265                 | -2.84                                  |
| 5.2                      | 265                 | -3.17                                  |
| 5                        | 265                 | -3.56                                  |
| 4.8                      | 265                 | -4.01                                  |
| 4.6                      | 265                 | -4.53                                  |
| 4.4                      | 265                 | -5.08                                  |
| 4.2                      | 265                 | -5.61                                  |
| 4                        | 265                 | -6.33                                  |
| 3.8                      | 85                  | -7.20                                  |
| 3.6                      | 85                  | -8.20                                  |
| 3.4                      | 85                  | -9.19                                  |
| 3.2                      | 85                  | -10.21                                 |
| 3                        | 85                  | -11.31                                 |
| 2.8                      | 85                  | -12.21                                 |
| 2.6                      | 85                  | -13.33                                 |
| 2.4                      | 85                  | -13.84                                 |
| 2.2                      | 85                  | -12.98                                 |
| 2                        | 265                 | -10.48                                 |
| 1.8                      | 265                 | -8.39                                  |
| 1.6                      | 265                 | -2.10                                  |
| 1.4                      | 265                 | 12.98                                  |
| 1.2                      | 265                 | 45.84                                  |
| 1                        | 265                 | 114.05                                 |
| 0.8                      | 265                 | 247.20                                 |
| 0.6                      | 265                 | 547.61                                 |
| 0.4                      | 265                 | 1200.92                                |
| 0.2                      | 265                 | 3233.64                                |
